# Supplementary material for: Next-Generation Bacillus anthracis Live Attenuated Spore Vaccine Based on the htrA- (High Temperature Requirement A) Sterne Strain
Source: PubMed Central journal article supplement (PMC4702213; doi:10.1038/srep18908), 2016-01-06
Supplement: srep18908-s1.pdf [file srep18908-s1.pdf]

**Next-Generation *Bacillus anthracis* Live Attenuated Spore Vaccine  
Based on the *htrA*<sup>-</sup> (High Temperature Requirement A) Sterne Strain**

Theodor Chitlaru, Maayan Israeli, Erez Bar-Haim, Uri Elia, Shahar Rotem, Sharon Ehrlich,  
Ofer Cohen and Avigdor Shafferman

**Supplementary Material**

**Figures S1-S4**

**Table S1**

**Table S2**

## Legends to Supplementary Figures and Table

### Supplementary Figure S1

#### **The mutated *Sterne* $\Delta$ *htrA* and parental *Sterne* strains exhibit similar germination and sporulation profiles.**

**a:** Germination assay of spores of the mutated strain (gray line) and parental strain (black line) demonstrate indistinguishable germination efficiency. The assay measures spectrophotometrically (every 30 seconds) the decrease in optical absorbance at a wavelength of 600 nm, characteristic of the depletion of spores from the culture. The figure depicts a representative experiment of at least 3 independent experiments which yielded indistinguishable results. **b:** Sporulation of the mutated (gray line) and parental (black line) strains in SSM cultures, measured by viable counting of bacteria before and after heat-shock (70°C for 20 minutes). Error bars indicate SD measured in at least three independent sporulation experiments. The analyses described employed the *Sterne* $\Delta$ *htrA* IIBR-BA104K<sup>R</sup> clone.

### Supplementary Figure S2

#### **Phenotypic characterization of the *Sterne* $\Delta$ *htrA* strain.**

**a:** Dilution drop assay of the parental *Sterne*, mutated *Sterne*  $\Delta$ *htrA* (IIBR-BA104K<sup>R</sup>) and the trans-complemented *Sterne* $\Delta$ *htrA*/*HtrA* strains at 37°C and 42°C degrees. Note cessation of growth of the mutated strain at 42°C and full recovery of growth of the trans-complemented strain. **b:** Growth rates of the parental *Sterne* (black histograms), mutated *Sterne*  $\Delta$ *htrA* (gray) and the trans-complemented  $\Delta$ *htrA*/*HtrA* (white) strains at increasing concentrations of H<sub>2</sub>O<sub>2</sub>. Histograms represent means obtained in 3 independent experiments. Error bars represent SD. \*, \*\*: means were analyzed using t-test (p<0.05).

### Supplementary Figure S3

#### **Proliferation assay of the *Sterne* $\Delta$ *htrA* strain in Macrophage cultures**

J774.1 macrophage infection assays carried out with the parental *Sterne* (black histograms), mutated *Sterne*  $\Delta$ *htrA* (gray) and the trans-complemented  $\Delta$ *htrA*/*HtrA* (white) strains. **a:** level of bacteria released from macrophages measured by viable counts at the indicated time points. **b:** macrophage disruption evaluated by the release of LDH and expressed as percentage of total-lysis control groups of uninfected cells collected at the indicated times and processed as specified by the commercial LDH-L kit employed for the assay (see Materials and Methods). All analyses described above employed the *Sterne* $\Delta$ *htrA* IIBR-BA104K<sup>R</sup> strain. Identical results were obtained with the antibiotic marker-less strain *Sterne* $\Delta$ *htrA* IIBR-BA106.

\* t-test p value <0.05.

## Supplementary Figure S4

### **Functional assays of the LF and EF toxin-subunits produced by the Sterne $\Delta$ htrA strain.**

**A:** LF functional assays of NBY-CO<sub>2</sub> supernatants of the Sterne (black curve) and Sterne $\Delta$ htrA (gray curve) strain, based on LF-mediated macrophage lysis. Negative control (no lysis) was carried out with the non-toxinogenic and unencapsulated  $\Delta$ Vollum strain (pXO1<sup>-</sup>; pXO2<sup>-</sup>; black dotted curve) or with a Sterne $\Delta$ lef strain (grey dotted curve); this strain is specifically mutated in the *lef* gene (encoding for LF; this novel strain will be described elsewhere, manuscript in preparation). **B:** EF functional assays of NBY-CO<sub>2</sub> supernatants of the Sterne (WT, lane 3) and Sterne $\Delta$ htrA ( $\Delta$ htrA, lane 4) strain, based on EF-mediated ATP depletion in a luciferase reaction. The results are expressed as percentage of the maximal luminescence obtained in the luciferase reaction (lane 1). Positive control: reactions in which 5ng of pure preparations of EF were added (lane 2); negative control: luciferase reaction carried out in the presence of supernatant collected from a non-toxinogenic and unencapsulated  $\Delta$ Vollum strain (lane 5) and luciferase reaction carried out in the presence of supernatant collected from a Sterne $\Delta$ cya strain (lane 6) specifically mutated in the *cya* gene (encoding for EF; this novel strain will be described elsewhere, manuscript in preparation). Error bars represent the SD calculated from 3 independent experiments. All analyses described employed the Sterne $\Delta$ htrA IIBR-BA106 clone. \*, \*\*: Means were analyzed using t-test ( $p < 0.05$ ).

## Supplementary Figure S5

### **PA production *in-vivo* and spore dissemination to spleens determined in guinea pigs infected SC with the Sterne, and Sterne $\Delta$ htrA strains.**

Guinea pigs were infected SC with various doses of Sterne (left panels) or Sterne $\Delta$ htrA (right panels) spores as indicated. **A:** PA levels in the serum of individual animals obtained from blood samples withdrawn 3 days post-inoculation. **B:** Spore viable counts in the spleens of animals at the indicated time points (days) post-infection. Each dot represents the bacterial load quantified for an individual animal; histograms represent the average value. In each of the 4 panels, the left histograms represent the infection in-put dose (marked "Input"). None of the animals were bacteremic through-out the experiment (level of detection in blood samples: 5CFU/ml). The experiments described employed the Sterne $\Delta$ htrA IIBR-BA104K<sup>R</sup> clone.

## Supplementary Table S1

### **Longevity of immunological status during 52 weeks in guinea pigs vaccinated with the Sterne $\Delta$ htrA strain**

Anti-PA, anti-bacteria and toxin-neutralizing (TNA) titres in blood samples of guinea pigs vaccinated SC by one dose of 10<sup>9</sup> or two doses of 10<sup>8</sup> (4 weeks apart) of Sterne $\Delta$ htrA spores (20 animals/group). The titer values represent the geometrical mean (and STD) of the titers of the animals within same experimental group. Fifty-two weeks post-immunization, all animals were challenged with 100xLD<sub>50</sub> of the fully virulent *B. anthracis* Vollum strain by IN infection.

# Supplementary Figure S1

**a**

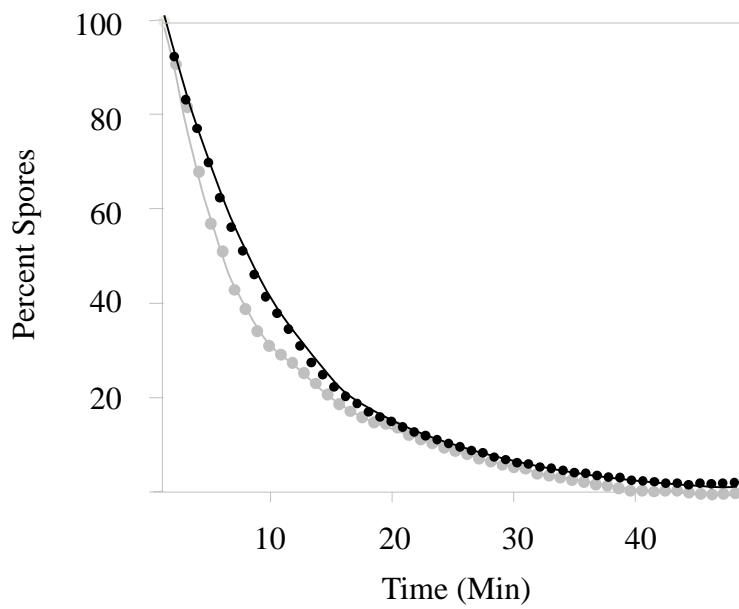

**b**

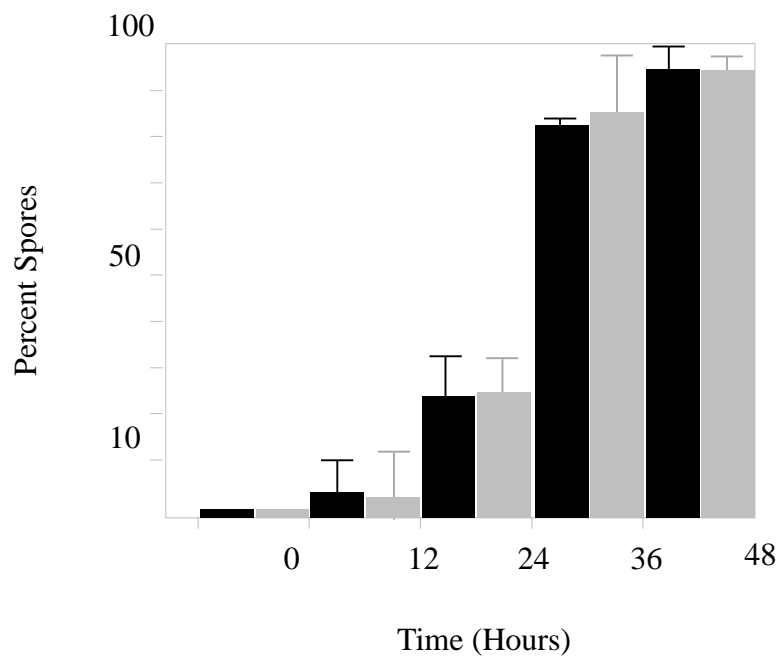

# Supplementary Figure S2

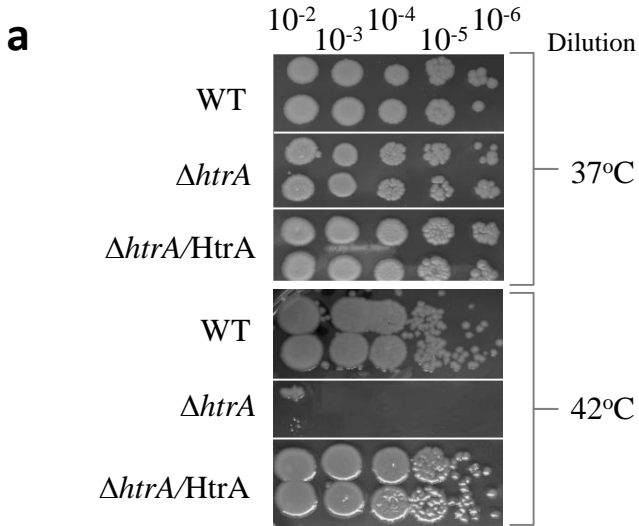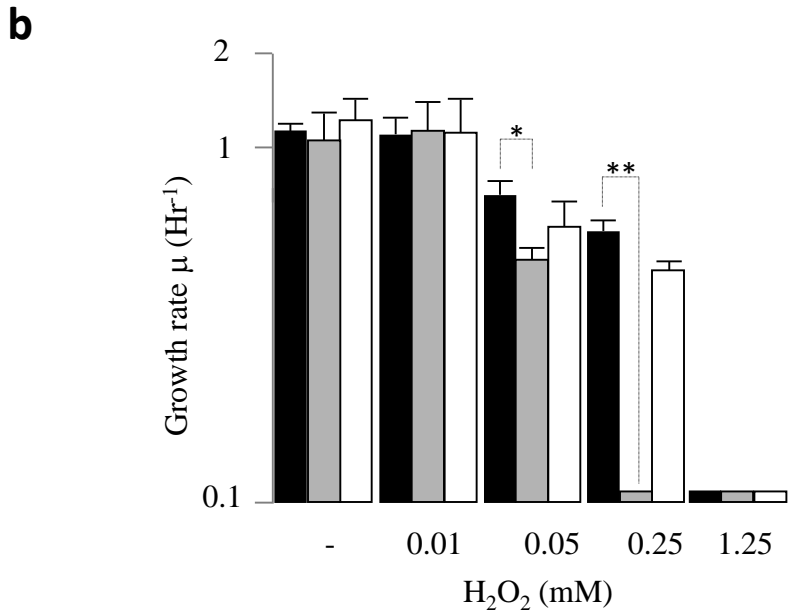

# Supplementary Figure S3

**a**

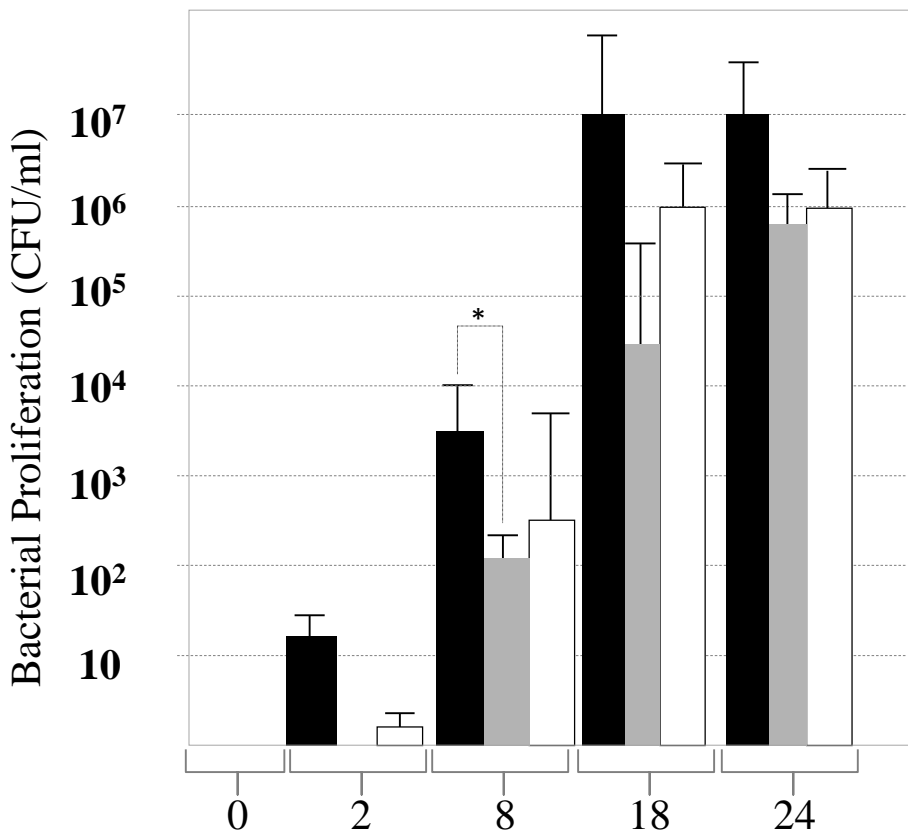

**b**

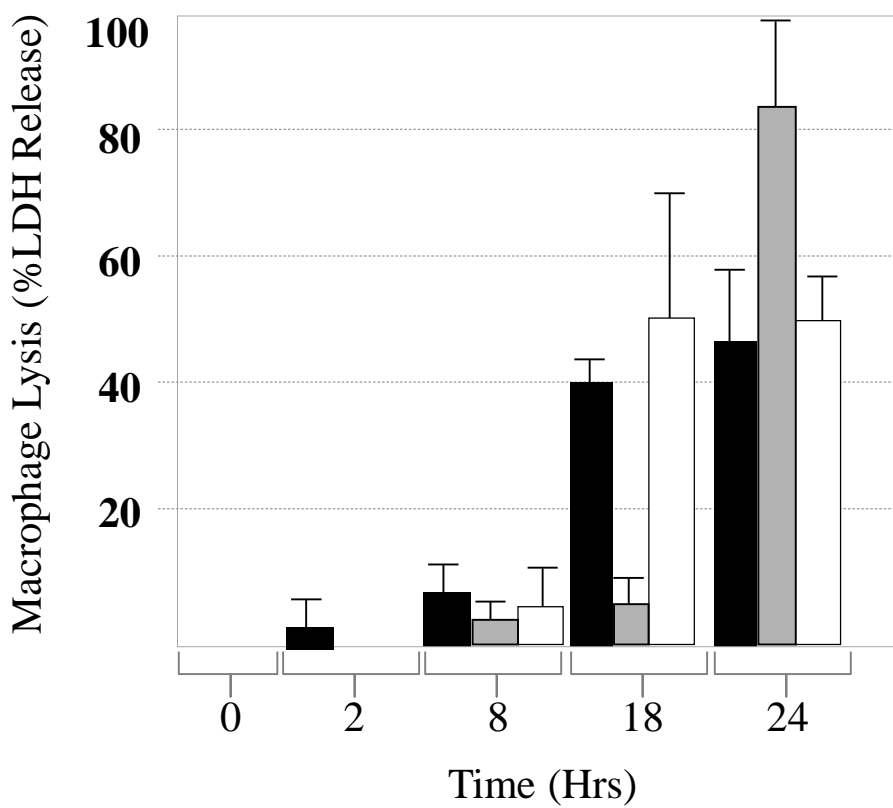

# Supplementary Figure S4

**a**

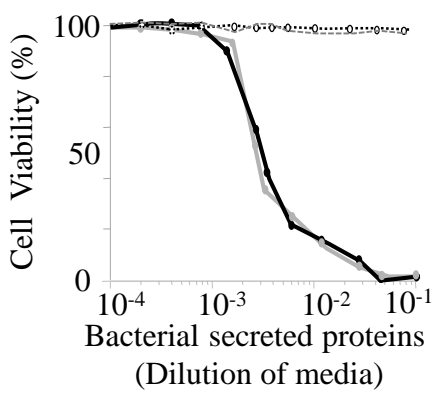

**b**

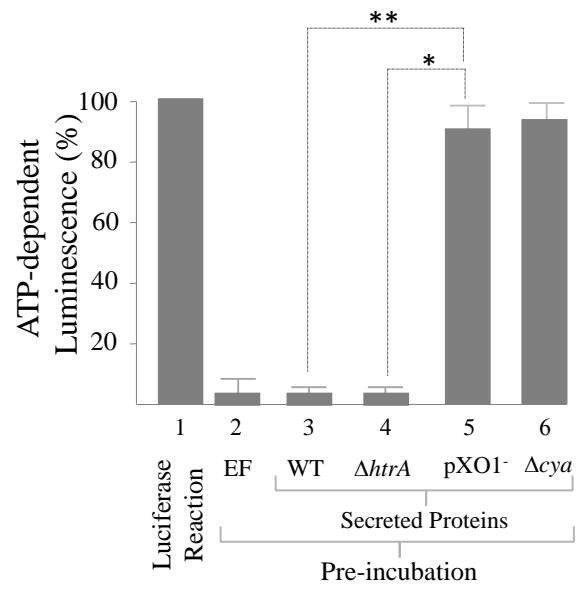

Supplementary Figure S5

a

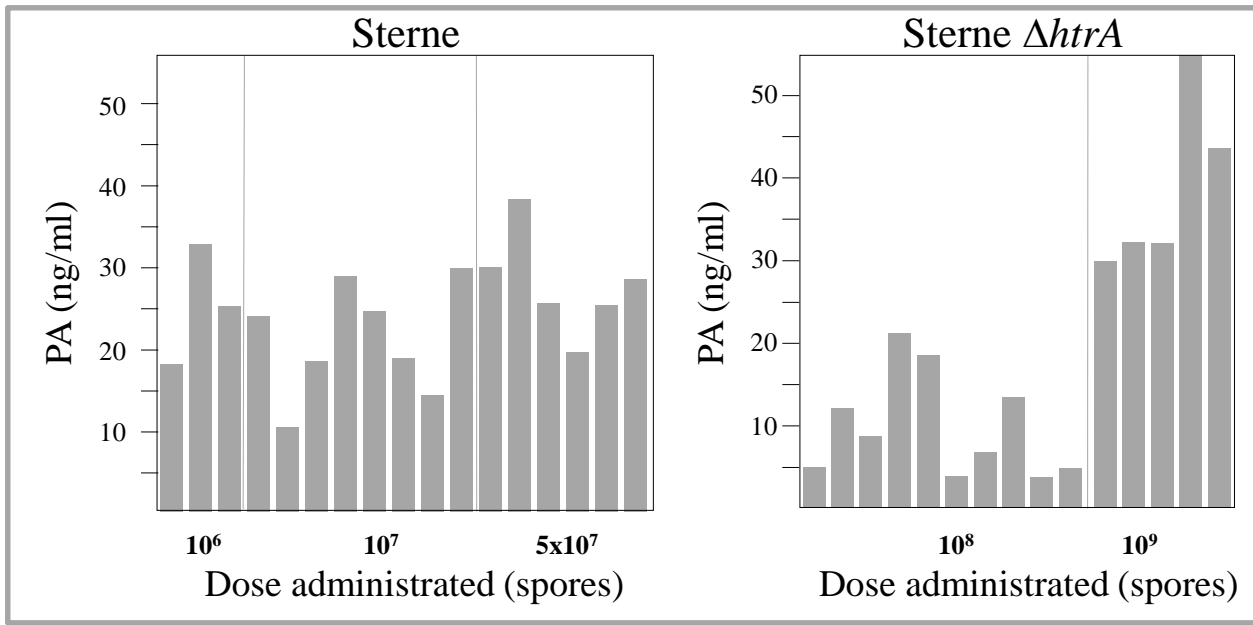

b

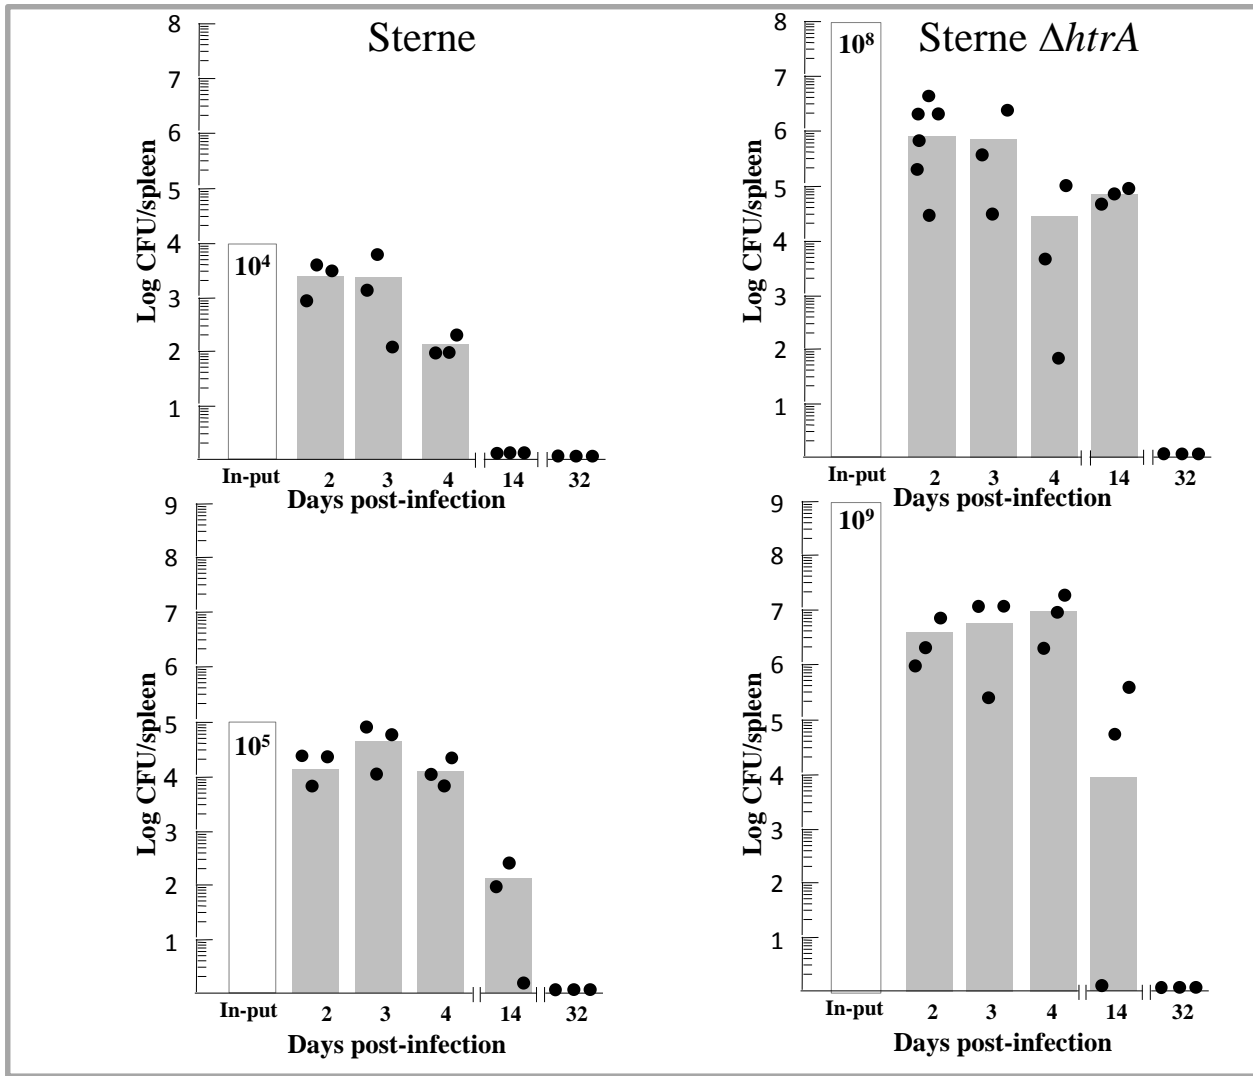



# Supplementary Table S1

## Longevity of immunological status during 52 weeks in guinea pigs vaccinated with the Sterne $\Delta$ *htrA* strain

| Time post-vaccination (weeks)   | Vaccine Dose 10 <sup>9</sup> (Single) |                               |                               | Vaccine Dose 10 <sup>8</sup> (Double) |                               |                               |
|---------------------------------|---------------------------------------|-------------------------------|-------------------------------|---------------------------------------|-------------------------------|-------------------------------|
|                                 | Anti-PA                               | Anti-Bacteria                 | TNA                           | Anti-PA                               | Anti-Bacteria                 | TNA                           |
| 5                               | 9.1x10 <sup>4</sup><br>(5.4)          | 4.2x10 <sup>5</sup><br>(5.6)  | 5.6x10 <sup>2</sup><br>(2.1)  | 1.9 x10 <sup>5</sup><br>(5.3)         | 8.4 x10 <sup>5</sup><br>(6.1) | 1.2 x10 <sup>3</sup><br>(3.4) |
| 9                               | 1.1x10 <sup>5</sup><br>(4.9)          | 7.6x10 <sup>5</sup><br>(5.5)  | 9x10 <sup>2</sup><br>(2.5)    | 2.5 x10 <sup>5</sup><br>(5.5)         | 8.4 x10 <sup>5</sup><br>(5.6) | 2.0 x10 <sup>3</sup><br>(3.3) |
| 24                              | 9 x10 <sup>4</sup><br>(4.9)           | 2.3x10 <sup>5</sup><br>(5.2)  | 1.6x10 <sup>3</sup><br>(2.9)  | 8.4 x10 <sup>4</sup><br>(4.6)         | 2.1 x10 <sup>5</sup><br>(4.9) | 1.1 x10 <sup>3</sup><br>(3.2) |
| 34                              | 8.9 x10 <sup>4</sup><br>(5.0)         | 1.2x10 <sup>5</sup><br>(4.9)  | 1.3 x10 <sup>3</sup><br>(2.9) | 6.4 x10 <sup>4</sup><br>(4.5)         | 2.3 x10 <sup>5</sup><br>(5.5) | 1.2 x10 <sup>3</sup><br>(3.2) |
| 50                              | 2.1 x10 <sup>4</sup><br>(4.5)         | 6.7 x10 <sup>4</sup><br>(4.9) | 7 x10 <sup>2</sup><br>(2.8)   | 3.1 x10 <sup>4</sup><br>(4.5)         | 8.3 x10 <sup>4</sup><br>(4.9) | 7.7 x10 <sup>2</sup><br>(3.1) |
| Survival of challenge (week 52) | 100%<br>(20/20)                       |                               |                               | 100%<br>(20/20)                       |                               |                               |

# Supplementary Table S2

## Bacterial strains, plasmids and primers used in this study

| Strains                            | Description/comments                                                                                                                                                                                                                                                                                                               | Source                                      |
|------------------------------------|------------------------------------------------------------------------------------------------------------------------------------------------------------------------------------------------------------------------------------------------------------------------------------------------------------------------------------|---------------------------------------------|
| <b><i>B. anthracis</i></b>         |                                                                                                                                                                                                                                                                                                                                    |                                             |
| Vollum                             | Parental (wt) strain. PA <sup>+</sup> LF <sup>+</sup> EF <sup>+</sup> (pXO1 <sup>+</sup> ) Cap <sup>+</sup> (pXO2)                                                                                                                                                                                                                 | ATCC14578                                   |
| Vollum $\Delta$ <i>htrA</i>        | <i>htrA</i> nonpolar deletion mutant of Vollum                                                                                                                                                                                                                                                                                     | Ref. 15                                     |
| Vollum $\Delta$ <i>htrA</i> /pHtrA | Complementation of $\Delta$ <i>htrA</i> by <i>htrA</i> expression in trans, from pASC-HtrA                                                                                                                                                                                                                                         | Ref. 15                                     |
| Sterne                             | Parental (wt) strain. PA <sup>+</sup> LF <sup>+</sup> EF <sup>+</sup> (pXO1 <sup>+</sup> ) Cap <sup>-</sup> (pXO2 <sup>-</sup> )                                                                                                                                                                                                   | IIBR stock                                  |
| Sterne $\Delta$ <i>htrA</i>        | <i>htrA</i> nonpolar deletion mutant of Sterne;<br>Two independent clones of this strain were generated: Sterne $\Delta$ <i>htrA</i> -BA104K <sup>R</sup> (carrying a Kanamycin resistance gene) and Sterne $\Delta$ <i>htrA</i> -BA106, devoid of antibiotic resistance. These two variants exhibit indistinguishable phenotypes. | This study                                  |
| Sterne $\Delta$ <i>htrA</i> /pHtrA | Complementation of $\Delta$ <i>htrA</i> by <i>htrA</i> expression in trans, from pASC-HtrA                                                                                                                                                                                                                                         | This study                                  |
| <b><i>E. coli</i></b>              |                                                                                                                                                                                                                                                                                                                                    |                                             |
| DH5 $\alpha$                       | <i>endA1 recA1</i>                                                                                                                                                                                                                                                                                                                 | Clontech                                    |
| GM2929                             | Dam13::Tn9(Cm <sup>R</sup> ) dcm-6                                                                                                                                                                                                                                                                                                 | NEB                                         |
| <b>Plasmids</b>                    |                                                                                                                                                                                                                                                                                                                                    |                                             |
| pEO- <i>htrA</i>                   | Ref. 15                                                                                                                                                                                                                                                                                                                            |                                             |
| pASC-HtrA                          | Ref. 15                                                                                                                                                                                                                                                                                                                            |                                             |
| pEGS- <i>htrA</i>                  | This study                                                                                                                                                                                                                                                                                                                         |                                             |
| pXX-I SclI                         | Ref. 45                                                                                                                                                                                                                                                                                                                            |                                             |
| <b>Primers</b>                     |                                                                                                                                                                                                                                                                                                                                    |                                             |
| Primers                            | Sequence (5'→3')                                                                                                                                                                                                                                                                                                                   | Use                                         |
| HTRA9                              | CAAGAAGGACACAAAACGTGACTATAC                                                                                                                                                                                                                                                                                                        | Confirmation of $\Delta$ <i>htrA</i> by PCR |
| HTRA10C                            | GTATAGCCGATAAAGAAAGTCTC                                                                                                                                                                                                                                                                                                            |                                             |
| KANA1                              | GAAGGAATGTCTCCTGCTAAGG                                                                                                                                                                                                                                                                                                             |                                             |
| KANA2C                             | CTGATCGACCGGACGCAGAAG                                                                                                                                                                                                                                                                                                              |                                             |
